# Supplementary material for: Atropoisomeric quinolinium salt promoting the access to both enantiomeric forms of methyl mandelate: a versatile NADH mimicElectronic supplementary information (ESI) available: experimental. See http://www.rsc.org/suppdata/cc/b2/b207434f/
Source: Royal Society of Chemistry journal article supplement (doi:10.1039/b207434f), 2002-09-10
Supplement: b207434f.doc [file b207434f.doc]

# Supplementary data

**Atropoisomeric quinolinium salt promoting the access to both enantiomeric forms of methyl mandelate: a versatile NADH mimic.**

Jean-Luc Vasse, Vincent Levacher,*Jean Bourguignon and Georges Dupas

Laboratoire de Chimie Organique Fine et Hétérocyclique, I.R.C.O.F., 1, rue Tesnieres, Mont-Saint-Aignan, France 76131. E-mail: Vincent.Levacher@insa-rouen.fr

### Supplementary Information

**General section.** Reagents were commercially available and used without further purification unless otherwise stated. Tetrahydrofuran (THF) was distilled from sodium/benzophenone ketyl under N2. Other solvents were used without further purification. Flash column chromatography was performed with a 32-63 mesh silica gel. Thin-layer chromatography was effected on silica gel 60 F254. NMR spectra were recorded on a 300 MHz spectrophotometer. The 1H and 13C NMR chemical shifts are reported in ppm downfield from tetramethylsilane.

**(*aS,1S*)-1,2-dihydro-6,7-dimethoxy-1,4-dimethyl-2-isopropyl-3oxo-benzazepino[5,4-b]quinoline (2).** A solution of methyllithium in ether (571 L, 1.4M, 0.8 mmol) was added dropwise to a solution of **1**1 (145 mg, 0.4 mmol) in THF (5 mL) at – 40°C. The reaction mixture was stirred for 2 hours at –40°C under nitrogen. After addition of methanol (2 mL), *N*-chlorosuccinimide (107 mg, 0.8 mmol) was added at 0°C and the solution was stirred for a further hour at this temperature. Water (5 mL) was added and the resulting aqueous layer was extracted with dichloromethane (3 x 10 mL). The combined organic phases were dried (MgSO4) and evaporated to give **2** (81%) as a white solid after purification by chromatography (SiO2 / EtOAc : cyclohexane 1: 4). 1H NMR  8.23 (1H, d, *J* = 7.7 Hz); 7.46 (1H, t, *J* = 7.2 Hz); 7.33 (1H, t, *J* = 7.2 Hz); 7.22-7.15 (3H, m); 5.08 (1H, hept, *J* = 6.8 Hz); 4.52 (1H, q, *J* = 7.3 Hz); 4.02 (3H, s); 4.00 (3H, s); 2.75 (3H, s); 1.28 (3H, d, *J* = 6.8 Hz); 1.09 (3H, d; *J* = 6.7 Hz); 1.08 (3H, d, *J* = 7.3 Hz). IR (neat): 2973, 1608, 1503, 1471, 1436, 1200, 1068, 766 cm-1. Mp: 187-188°C. Anal. Calcd for C24H26N2O3: C, 73.82; H, 6.71; N, 7.17. Found: C, 73.75; H, 6.69; N, 7.15.

**(*aS,1S*)-1,2-dihydro-6,7-dimethoxy-1,4,9-trimethyl-2-isopropyl-3-oxobenzazepino[5,4-b]quinolinium trifluoromethane sulfonate (3).** To a solution of **2** (390 mg, 1 mmol) in CH2Cl2 (5 ml) was added methyl trifluoromethanesulfonate (180 mg, 1.1 mmol). The solution was stirred at room temperature for 2 hours and the solvent evaporated to afford quinolinium salt **3** as a white solid in quantitative yield. 1H NMR  7.85 (1H, s); 7.77-7.73 (1H, m); 7.64-7.56 (2H, m); 7.50-7.43 (2H, m); 4.92 (1H, hept, *J* = 6.8 Hz); 4.70 (1H, q, *J* = 7.4 Hz); 4.47 (3H, s); 4.31 (3H, s); 4.12 (3H, s); 2.94 (3H, s); 1.34 (3H, d, *J* = 6.9 Hz); 1.19 (3H, d; *J* = 6.9 Hz); 1.12 (3 H, d, *J* = 6.9 Hz). 13C NMR  163.71, 159.15, 153.13, 152.70, 149.30, 145.98, 139.10, 133.76, 133.30, 131.60, 129.31, 129.06, 127.83, 125.71, 103.75, 100.67, 58.73, 57.11, 53.32, 48.49, 45.77, 20.81, 20.63, 20.44, 19.46. 19FNMR  –78,67. Anal. Calcd for C26H29 F3N2O6S: C, 56.31; H, 5.27; N, 5.05. Found: C, 56.45; H, 5.34; N, 4.98.

**(*aS,1S,4S*)-1,2,4,9-tetrahydro-1,4,9-trimethyl-6,7-dimethoxy-2-isopropyl-3-oxo-benzazepino[5,4-b]quinoline (4).** To a solution of quinolinium salt **3** (96 mg, 0.18 mmol) in ethanol (2 mL) was added NaBH4 (10 mg, 0.26 mmol) in one portion. The resulting solution was stirred at room temperature for 2 hours. After addition of water (3 mL) and phase separation, the aqueous phase was extracted with CH2Cl2 (2 x 5 mL). The combined organic phases were dried (MgSO4) and evaporated to afford **4** in 93% yield as a mixture of conformational diastereoisomers (*aS,1S,4S*)**-4** and (*aR,1S,4S*)**-4**. 1H NMR of the reactive conformational diastereoisomer (*aR,1S,4S*)-**4**  7.40-7.10 (4H, m); 6.68 (1H, s); 6.60 (1H, s); 4.94 (1H, q, *J* = 7.2 Hz); 4.40 (1H, q, *J* = 7.2 Hz); 3.90 (3H, s); 3.86 (3H, s); 3.63 (1H, hept, *J* = 6.8 Hz); 3.13 (3H, s); 1.78 (3H, d, *J* = 7.2 Hz); 1.42 (3H, d, *J* = 6.8 Hz); 1.24 (3H, d, *J* = 7.2 Hz); 0.81 (3H, s, *J* = 6.8 Hz). 1H NMR of the unreactive conformational diastereoisomer (*aS,1S,4S*)-**4**  7.40-7.10 (4H, m); 6.71 (1H, s); 6.60 (1H, s); 5.13 (1H, hept, *J* = 6.8 Hz); 4.47 (1H, q, *J* = 7.2 Hz); 3.90 (3H, s); 3.88 (3H, s); 3.82 (1H, q, *J* = 7.2 Hz); 3.25 (3H, s); 1.43 (3H, d, *J* = 7.2 Hz); 1.37 (3H, d, *J* = 6.8 Hz); 1.20 (3H, d, *J* = 7.2 Hz); 1.03 (3H, s, *J* = 6.8 Hz). HRMS (FAB): calcd for C25H31N2O3 [(M+H)+] 407.2335, found  407.2332

**(*aS,1S,4R*)-1,2,4,9-tetrahydro-1,4,9-trimethyl-6,7-dimethoxy-2-isopropyl-3-oxo-benzazepino[5,4-b]quinoline (4).** To a suspension of quinolinium salt **3** (116 mg, 0.21 mmol) in THF (5 mL) was added a solution of BH3 in THF (430 L, 1M, 25 mmol). The reaction mixture was strirred for 2 hours. Water (5 mL) was added and the aqueous layer was extracted with dichloromethane. The combined organic phases were washed with water, dried (MgSO4) and evaporated to give(*aS,1S,4R*)-**4** in 95%yield as a pale rose solid. 1H NMR  7.15-7.40 (4 H, m); 6.67 (1 H, s); 6.59 (1 H, s); 5.13 (1 H, hept, *J* = 6.8 Hz); 4.54 (1 H, q, *J* = 7.2 Hz); 4.45 (1 H, q, *J* = 7.0 Hz); 3.89 (3 H, s); 3.85 (3 H, s); 3.19 (3 H, s); 1.70 (3 H, d, *J* = 7.2 Hz); 1.25 (3 H, d, *J* = 6.8 Hz); 1.20 (3 H, d, *J* = 7.0 Hz); 1.01 (3 H, d, *J* = 6.8 Hz). HRMS (FAB): calcd for C25H31N2O3 [(M+H)+] 407.2335, found  407.2339

**Reduction of methyl benzoylformate with NADH mimic (*aS,1S,4R*)-4 [obtained by reduction of (aS, 1S)-3 with BH3]** . To a solution of (*aS,1S,4R*)-**4** (102 mg, 0.25 mmol) in degassed acetonitile (2 mL) was added methyl benzoylformate (40 mg, 0. 24 mmol) and magnesium perchlorate (55 mg, 0.25 mmol). The solution was stirred in the dark, under nitrogen for 2 days. A few drops of water were added and the solvent evaporated. The crude product was purified by flash chromatography (SiO2 / Et2O : cyclohexane 1: 4) to give methyl mandelate (50%) in up to 88% ee (R). Enantiomeric excess was determined by HPLC analysis using a Chiracel OD column (250 x 4.6 mm; 10 µm). Chromatographic conditions: injection: 20 µl (0.5 mg of methyl mandelate in 10 mL of hexane). Eluent: hexane/2-propanol: 90/10. Flow rate: 1 mL/min. Pressure: 300 psi. Temperature: 22°C. UV detection: =235 nm. Retention time: 9.2 min [(S)-enantiomer] and 14.8 min [(R)-enantiomer]. The quinolinium perchlorate salt (*aS,1S*)-**3** was recovered in 90% yield after elution of the column with EtOH. 1H NMR of (*aS,1S*)-**3** (CD3OD)  7.95-7.67 (6H, m); 5.05 (1H, q, *J* = 7.5 Hz); 4.90 (1H, hept, *J* = 7.0 Hz); 4.42 (3H, s); 4.26 (3H, s); 4.18 (3H,s); 3.01 (3H, s); 1.45 (3H, d, *J* = 7.2 Hz), 1.26 (3H, d, *J* = 7.2 Hz); 1.17 (3H, d, *J* = 7.0 Hz). HRMS (FAB): calcd for C25H29N2O3 (M+) 405.2178, found  405.2172

**Reduction of methyl benzoylformate with NADH mimic (*aS,1S,4S*)-4 [obtained by reduction of (aS, 1S)-3 with NaBH4]**. Following the same procedure as above, with a mixture of conformational diastereoisomers (*aS,1S,4S*)**-4** and (*aR,1S,4S*)**-4** (80/20), methyl mandelate was obtained in up to 78% ee (S) and 40% yield. Quinolinium perchlorate salt (*aR,1S*)-**3** was recovered in 90% yield. 1H NMR of (*aR,1S*)-**3** (CD3OD)  7.95 (1H, d, *J* = 7.5 Hz); 7.87-7.67 (5H, m); 5.12 (1H, q, *J* = 7.5 Hz); 4.38 (3H, s); 4.25 (3H, s); 4.17 (3H,s); 4.00 (1H, hept, *J* = 7.0 Hz); 3.07 (3H, s); 1.84 (3H, d, *J* = 7.2 Hz), 1.56 (3H, d, *J* = 7.2 Hz); 0.98 (3H, d, *J* = 7.0 Hz). HRMS (FAB): calcd for C25H29N2O3 (M+) 405.2178, found  405.2191

Conformational analysis of the quinolinium perchlorate salt (aS,1S)-**3** and(aR,1S)-**3** in *d4*-methyl alcohol. Selected NOESY cross-signals are indicated with double arrows.

Conformational analysis of the mimics(aS,1S,4R)-**4** and(aR,1S,4S)-4 in CDCl3. Selected NOESY cross-signals are indicated with double arrows.

**REFERENCES:**

1. J.-L. Vasse, G. Dupas, J. Duflos, G. Quéguiner, J. Bourguignon, V. Levacher, *Tetrahedron Lett*., 2001, **42**, 3713.
